# 1 Combining full-length gene assay and SpliceAI to interpret the splicing impact 2 of all possible *SPINK1* coding variants

3  
4 Hao Wu,<sup>1,2,\*</sup> Jin-Huan Lin,<sup>1,2,\*</sup> Xin-Ying Tang,<sup>3,2\*</sup> Wen-Bin Zou,<sup>1,2</sup> Sacha Schutz,<sup>4,5</sup> Emmanuelle  
5 Masson,<sup>4,5</sup> Yann Fichou,<sup>4</sup> Gerald Le Gac,<sup>4,5</sup> Claude Férec,<sup>4</sup> Zhuan Liao,<sup>1,2,§</sup> Jian-Min Chen<sup>4,§</sup>

6  
7 <sup>1</sup>Department of Gastroenterology, Changhai Hospital, Naval Medical University, Shanghai, China.

8 <sup>2</sup>Shanghai Institute of Pancreatic Diseases, Shanghai, China.

9 <sup>3</sup>Department of Prevention and Health Care, Eastern Hepatobiliary Surgery Hospital, Naval Medical  
10 University, Shanghai, China.

11 <sup>4</sup>Univ Brest, Inserm, EFS, UMR 1078, GGB, F-29200 Brest, France.

12 <sup>5</sup>CHRU Brest, F-29200 Brest, France.

13

14 \*These authors share co-first authorship.

15

## 16 <sup>§</sup>Correspondence:

17 Jian-Min Chen, Univ Brest, Inserm, EFS, UMR 1078, GGB, 22 avenue Camille Desmoulins, 29238  
18 BREST, France. Email: [jian-min.chen@univ-brest.fr](mailto:jian-min.chen@univ-brest.fr)

19 Zhuan Liao, Department of Gastroenterology, Changhai Hospital, Naval Medical University, 168  
20 Changhai Road, Shanghai 200433, China. E-mail: [liao zhuan@smmu.edu.cn](mailto:liao zhuan@smmu.edu.cn)

21

## 22 Abstract

23 **Background:** Single-nucleotide variants (SNVs) within gene coding sequences can significantly impact  
24 pre-mRNA splicing, bearing profound implications for pathogenic mechanisms and precision  
25 medicine. However, reliable splicing analysis often faces practical limitations, especially when the  
26 relevant tissues are challenging to access. While *in silico* predictions are valuable, they alone do not  
27 meet clinical classification standards. In this study, we aim to harness the well-established full-length  
28 gene splicing assay (FLGSA) in conjunction with SpliceAI to prospectively interpret the splicing effects  
29 of all potential coding SNVs within the four-exon *SPINK1* gene, a gene associated with chronic  
30 pancreatitis.

31 **Results:** We initiated the study with a retrospective correlation analysis (involving 27 previously  
32 FLGSA-analyzed *SPINK1* coding SNVs), progressed to a prospective correlation analysis (incorporating  
33 35 newly FLGSA-tested *SPINK1* coding SNVs), followed by data extrapolation, and ended with further  
34 validation. In total, we analyzed 67 *SPINK1* coding SNVs, representing 9.3% of all 720 possible coding

NOTE: This preprint reports new research that has not been certified by peer review and should not be used to guide clinical practice.

35 SNVs and affecting 19.2% of the 240 coding nucleotides. Among these 67 FLGSA-analyzed SNVs, 12  
36 were found to impact splicing. Through extensive cross-correlation of the FLGSA-obtained and  
37 SpliceAI-predicted data, we reasonably extrapolated that none of the unanalyzed 653 coding SNVs in  
38 the *SPINK1* gene are likely to exert a significant effect on splicing. Out of these 12 splice-altering  
39 events, nine produced both wild-type and aberrant transcripts, while the remaining three exclusively  
40 generated aberrant transcripts. These splice-altering SNVs were predominantly concentrated in  
41 exons 1 and 2, particularly affecting the first and/or last coding nucleotide of each exon. Among the  
42 12 splice-altering events, 11 were missense variants, constituting 2.17% of the 506 potential  
43 missense variants, while one was synonymous, accounting for 0.61% of the 164 potential  
44 synonymous variants.

45 **Conclusions:** Integrating FLGSA with SpliceAI, we conclude that less than 2% (1.67%) of all possible  
46 *SPINK1* coding SNVs have a discernible influence on splicing outcomes. Our findings underscore the  
47 importance of performing splicing analysis in the broader genomic sequence context of the study  
48 gene, highlight the inherent uncertainties associated with intermediate SpliceAI scores (i.e., those  
49 ranging from 0.20 to 0.80), and have general implications for the shift from "retrospective" to  
50 "prospective" analysis in terms of variant classification.

51

52 **Keywords:** Chronic pancreatitis, *In silico* prediction, Full-length gene splicing assay, Missense variant,  
53 Precision medicine, Pre-mRNA splicing, Single-nucleotide variant, SpliceAI, Splice site, *SPINK1*

54

## 55 **Background**

56 Single-nucleotide variants (SNVs) within the coding sequences of genes have the potential to exert a  
57 profound influence on pre-mRNA splicing. Remarkably, approximately 10% of disease-associated  
58 missense variants have been recognized as having the capacity to modulate pre-mRNA splicing [1].  
59 This influence goes beyond missense variants and includes synonymous and nonsense variants [2, 3].  
60 These findings have far-reaching implications for our understanding of disease pathogenesis and the  
61 advancement of precision medicine. For instance, what was once considered a 'neutral' missense  
62 variant or a 'synonymous' variant may, upon closer examination, be found to be disease-causing or  
63 related due to its impact on splicing. Similarly, the effectiveness of molecular treatment strategies  
64 targeting specific 'missense' or 'nonsense' variants may be compromised if these variants  
65 unexpectedly affect splicing.

66 The ideal approach for investigating the splicing effects of clinically detected SNVs is the analysis  
67 of RNA from pathophysiologically relevant tissues. However, practical constraints often limit access  
68 to these tissue samples [4]. As an alternative, RNA analysis from patient blood cells or immortalized

69 lymphoblastoid cells is commonly employed, under the assumption that the gene of interest exhibits  
70 normal expression in these cell types [5]. When these options prove unfeasible, the frequently  
71 employed approach is the cell culture-based minigene splicing assay [6]. It is essential to  
72 acknowledge the inherent limitation of this assay – its inability to capture the broader genomic  
73 context of the study gene. This limitation could lead to erroneous findings [7, 8] due to the intricate  
74 nature of splicing regulation [9, 10].

75 In recent years, there have been significant advancements in the prediction of splicing outcomes  
76 for SNVs. An outstanding example is SpliceAI [11], a 32-layer deep neural network widely recognized  
77 as the most accurate tool for predicting splicing variants currently available (e.g., [12-15]). While  
78 these *in silico* prediction tools are valuable, they cannot be used in isolation to establish  
79 pathogenicity in accordance with variant classification guidelines recommended by the American  
80 College of Medical Genetics and Genomics (ACMG) [16]. Instead, they serve as first-line tools for  
81 variant classification and prioritization.

82 Another critical concern in the realm of precision medicine is the retrospective nature of  
83 functional analyses conducted on clinically identified variants [17]. This issue becomes increasingly  
84 urgent in an era when exome and genome sequencing have become integral to clinical diagnostics.  
85 Addressing this challenge requires a shift toward the prospective assessment of the functional impact  
86 of all potential SNVs at clinically significant loci in the human genome [18]. Multiplexed assays for  
87 variant effects (MAVE) offer a solution by enabling systematic collection of functional data for a  
88 multitude of variants in a single experiment [19]. A notable example is the prospective assessment of  
89 the functional impact, including splicing, of nearly 4,000 single nucleotide substitutions across 13  
90 exons of the 24-exon *BRCA1* gene [20]. However, MAVE is technically and resource demanding,  
91 limiting its widespread application in many laboratories.

92 *SPINK1* (OMIM #167790) stands out as one of the primary genes associated with chronic  
93 pancreatitis [21]. Located on chromosome 5q32, the pathologically relevant *SPINK1* mRNA isoform  
94 (NM\_001379610.1) comprises four exons, encoding a 79-amino acid precursor protein that  
95 eventually yields the mature 56-amino-acid pancreatic secretory trypsin [22, 23]. Loss-of-function  
96 variants in the *SPINK1* gene increase susceptibility to chronic pancreatitis through the trypsin-  
97 dependent pathway [21, 24, 25]. Previously, we successfully cloned the ~7-kb genomic sequence of  
98 the four-exon *SPINK1* gene into the pcDNA3.1/V5-His-TOPO vector, establishing a cell culture-based  
99 full-length gene splicing assay (FLGSA) [26]. Notably, FLGSA, unlike the frequently used minigene  
100 assay, preserves the broader natural genomic context of the gene under investigation—a crucial  
101 factor considering the intricacies of splicing regulation. Naturally, FLGSA also provides a practical  
102 advantage over the minigene assay, enabling comprehensive analysis of all coding and intronic  
103 variants within a consistent genomic framework.

104 In the context of the *SPINK1* gene, we have previously employed the FLGSA assay to analyze both  
105 known coding and intronic variants [7, 27-31]. The accuracy of the FLGSA assay is illuminated by the  
106 study of the *SPINK1* c.194+2T>C variant, a type of variant often considered to cause a complete  
107 functional loss of the affected allele due to its occurrence within the canonical GT splice donor site  
108 [32]. Specifically, the findings from the FLGSA assay [27] were in alignment with *in vivo* splicing data  
109 [33] for c.194+2T>C, revealing a notable presence of wild-type (WT) transcripts alongside with exon  
110 3-skipping aberrant transcripts (N.B. the ratio of WT transcripts to aberrant transcripts was  
111 subsequently estimated to be 1:9 [34]). Remarkably, this preservation of 10% residual function was  
112 associated with the less severe phenotypes observed in *SPINK1* c.194+2T>C homozygotes, who  
113 exhibit chronic pancreatitis with variable expressivity [35]. In contrast, homozygous *SPINK1* variants  
114 leading to a complete 100% loss of the gene product are linked to a more severe phenotype referred  
115 to as severe infantile isolated exocrine pancreatic insufficiency [36].

116 In this study, we set out to harness the combined power of the FLGSA assay and SpliceAI's  
117 predictive capabilities to prospectively interpret the splicing effects of all potential coding SNVs  
118 within the *SPINK1* gene.

119

## 120 **Methods**

### 121 **Research rationale and strategy**

122 The primary objective of this study was to prospectively interpret the splicing impact of all potential  
123 coding SNVs within the *SPINK1* gene by leveraging a synergistic combination of the FLGSA assay and  
124 SpliceAI predictions. Our hypothesis was grounded in the belief that insights derived from correlating  
125 experimental data obtained through FLGSA with SpliceAI predictions for a subset of *SPINK1* coding  
126 SNVs could be reasonably extrapolated to the broader pool of unanalyzed *SPINK1* coding SNVs. The  
127 study would begin with a retrospective correlation analysis (using previously FLGSA-analyzed *SPINK1*  
128 coding SNVs), advance to a prospective correlation analysis (involving newly FLGSA-tested *SPINK1*  
129 coding SNVs), followed by data extrapolation, and end with further validation (Fig. 1).

130

### 131 **SpliceAI**

132 SpliceAI provides four  $\Delta$  scores: acceptor gain (AG), acceptor loss (AL), donor gain (DG), and donor  
133 loss (DL). These scores represent the maximum difference between the probability of the variant and  
134 the reference alleles concerning splice-altering. The  $\Delta$  score ranges from 0 to 1, with higher scores  
135 indicating a greater likelihood that the variant affects splicing. Variants with a  $\Delta$  score of <0.20 were  
136 generally considered unlikely to have a substantial impact on splicing, while variants with a  $\Delta$  score  
137 exceeding 0.80 were generally associated with a high specificity for splicing alterations [11]. SpliceAI

138

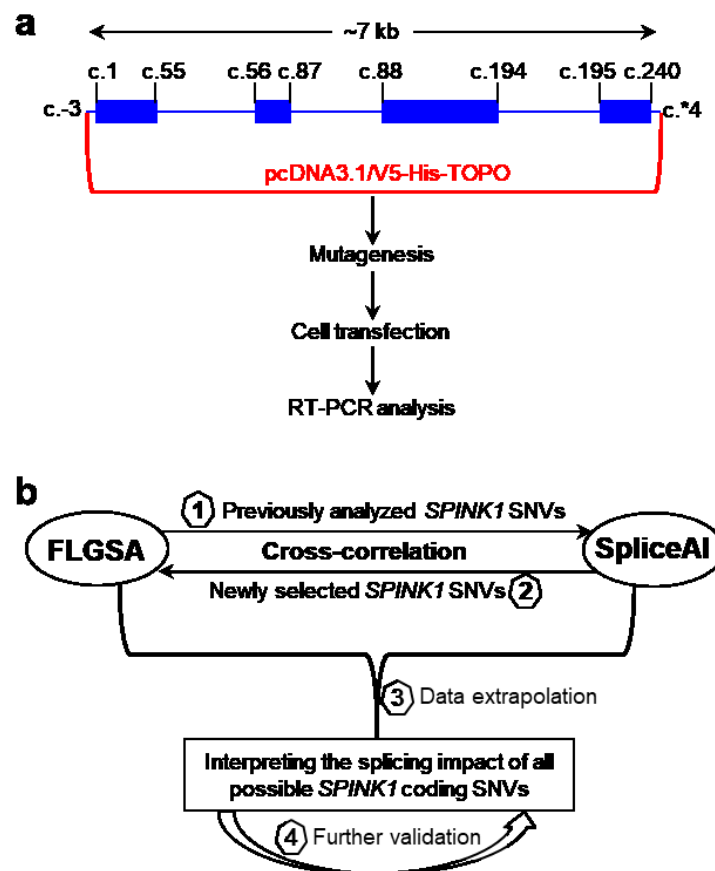

139

140 **Figure 1.** Overview of the FLGSA assay and research strategy. **a** Representation of the *SPINK1* full-  
141 length gene expression vector and the experimental steps involved in the FLGSA assay for each study  
142 variant. The coding sequences of the four-exon *SPINK1* gene are to scale, while the intronic and  
143 untranslated region sequences are not. The reference *SPINK1* genomic sequence is NG\_008356.2, and  
144 the reference *SPINK1* mRNA sequence is MANE (Matched Annotation from the NCBI and EMBL-EBI  
145 [37]) select ENST00000296695 or NM\_001379610.1. NM\_001379610.1 represents the *SPINK1*  
146 transcript isoform expressed in the exocrine pancreas. The starting and ending positions of the coding  
147 sequences in each exon, as well as those of the *SPINK1* genomic sequence cloned into the  
148 pcDNA3.1/V5-His-TOPO vector, are indicated in accordance with NM\_001379610. **b** Illustration  
149 demonstrating how the FLGSA assay was integrated with SpliceAI to prospectively evaluate the splicing  
150 effects of all potential coding variants within the *SPINK1* gene. Abbreviations: FLGSA, full-length gene  
151 splicing assay; RT-PCR, reverse transcription-PCR; SNVs, single-nucleotide variants.

152

153 also provides the pre-mRNA positions of the predicted splicing effect with respect to the variant  
154 position. For *SPINK1* variants, positive and negative pre-mRNA positions indicate positions 5' and 3'  
155 to the variant position in terms of the gene's sense strand.

156 Our retrospective analysis involved comparing FLGSA data with SpliceAI predictions for known  
157 *SPINK1* coding SNVs. For our prospective analysis, we selected new *SPINK1* coding SNVs for FLGSA

158 analysis based on SpliceAI-predicted  $\Delta$  scores. These steps relied on SpliceAI  $\Delta$  scores obtained from  
159 [38] using the default settings of SpliceAI in February 2020. These SpliceAI  $\Delta$  scores correspond to  
160 Illumina precomputed scores created using Gencode v24 and max distance = 50bp at the time [11]  
161 and align with those accessible to academic users on the SpliceAI Virtual website [39]. Importantly, in  
162 May 2023, SpliceAI retired these Illumina precomputed scores. To adapt to this change and refine the  
163 cross-correlation, we additionally conducted a second-step analysis for *SPINK1* coding SNVs that  
164 underwent the FLGSA assay, utilizing SpliceAI  $\Delta$  scores obtained from SpliceAI Lookup [40] with the  
165 following parameters: (i) Genome version, hg38; (ii) Score type, Raw; and (iii) Max distance, 10,000.  
166 This new set of SpliceAI  $\Delta$  scores was manually obtained in October 2023.

167

### 168 **Collation of known *SPINK1* coding variants with FLGSA data**

169 To date, the FLGSA assay has been employed to analyze 27 clinically identified *SPINK1* coding SNVs,  
170 comprising 24 missense variants and 3 synonymous variants [7, 31]. All these 27 variants were  
171 included in our retrospective correlation analysis.

172

### 173 **Selection of potential *SPINK1* coding variants for FLGSA**

174 We conducted a rigorous selection process to identify potential *SPINK1* coding variants for FLGSA.  
175 This process involved a comprehensive assessment of Illumina precomputed SpliceAI  $\Delta$  scores for all  
176 720 potential coding SNVs, which arose from the multiplication of 240 coding nucleotides by 3,  
177 within the *SPINK1* gene. As a general guideline, we chose to encompass all three possible SNVs at the  
178 beginning (with the exception of exon 1) and end (excluding exon 4) of each exon, regardless of their  
179 SpliceAI  $\Delta$  scores. Additionally, we included SNVs with at least one SpliceAI  $\Delta$  score  $\geq 0.20$ , excluding  
180 those deemed physiologically irrelevant. Furthermore, we incorporated some variants predicted to  
181 have no impact on splicing as controls. This process initially led us to select 35 SNVs. For the purpose  
182 of further validation, we selected additional five SNVs for FLGSA. More detailed information is  
183 provided in the *Results* section.

184

### 185 **FLGSA**

186 The newly selected *SPINK1* coding SNVs underwent FLGSA analysis, as previously described [27, 29,  
187 32]. Specifically, the introduction of the selected variants into the full-length gene expression vector  
188 containing the WT *SPINK1* genomic sequence [26] and the subsequent confirmation of the  
189 introduced variants through Sanger sequencing were executed by GENEWIZ Biotech Co. (Suzhou,  
190 China). All subsequent experimental procedures were conducted at the Shanghai Changhai  
191 laboratory.

192

193 ***Cell culture, transfection, RNA extraction, and reverse transcription (RT)***

194 Human embryonic kidney 293T (HEK293T) cells were cultured in the DMEM basic medium (Gibco)  
195 with 10% fetal calf serum (Procell).  $3.5 \times 10^5$  cells were seeded per well in 6-well plates 24 hours  
196 before transfection. 2.5  $\mu\text{g}$  of either WT or variant plasmid, mixed with HieffTrans Universal  
197 Transfection Reagent (Yeasen), was used for transfection per well. Forty-eight hours after  
198 transfection, total RNA was extracted using the FastPure Cell/Tissue Total RNA Isolation Kit V2  
199 (+gDNA wiper) (Vazyme). RT was carried out using the HiScript III 1st Strand cDNA Synthesis Kit  
200 (Vazyme), incorporating 2  $\mu\text{L}$  of 5  $\times$  gDNA wiper Mix, 2  $\mu\text{L}$  of 10  $\times$  RT Mix, 2  $\mu\text{L}$  of HiScript III Enzyme  
201 Mix, 1  $\mu\text{L}$  of Oligo (dT)20VN, and 1  $\mu\text{g}$  of total RNA.

202

203 ***RT-PCR and sequencing of the resulting products***

204 RT-PCR was performed in a 25- $\mu\text{L}$  reaction mixture containing 12.5  $\mu\text{L}$  2  $\times$  Taq Master Mix (Vazyme),  
205 1  $\mu\text{L}$  cDNA, and 0.4  $\mu\text{M}$  of each primer. The primers used were 5'-GGAGACCCAAGCTGGCTAGT-3'  
206 (forward) and 5'-AGACCGAGGAGAGGGTTAGG-3' (reverse), both of which are located within the  
207 pcDNA3.1/V5-His-TOPO vector sequence. The PCR program had an initial denaturation step at 94°C  
208 for 5 min, followed by 35 cycles of denaturation at 94°C for 30 s, annealing at 55°C for 30 s, and  
209 extension at 72°C for 5 min, and a final extension step at 72°C for 7 min. RT-PCR products presenting  
210 either a single band or multiple bands were excised from the agarose gel and then purified using a  
211 Gel Extraction Kit (Omega Bio-Tek). The sequencing primers employed were identical to those used  
212 for the RT-PCR analyses. Sequencing reactions were conducted using the BigDye Terminator v3.1  
213 Cycle Sequencing Kit (Applied Biosystems).

214

215 ***Approximate estimate of relative expression levels of co-expressed WT and aberrant transcripts***

216 To estimate the relative expression levels of aberrantly spliced transcripts in comparison to WT  
217 transcripts for variants that produced both types of transcripts, we utilized ImageJ [41].

218

219 ***The contribution of generative artificial intelligence to the writing process***

220 We used ChatGPT-4 [42] to enhance the readability and linguistic quality of this manuscript. We take  
221 full responsibility for the content presented herein.

222

223 **Results**

224 **Retrospective correlation of FLGSA data with SpliceAI predictions for known *SPINK1* coding SNVs**

225 We initiated the study with a retrospective analysis involving known *SPINK1* coding SNVs that had  
226 previously undergone FLGSA analysis. All 27 such variants consistently yielded WT transcripts in the

227 FLGSA assay [7, 31]. Details of these variants, including their precomputed SpliceAI  $\Delta$  scores by  
228 Illumina [11], are provided in [Table 1](#) (see the end of the manuscript).

229 Among the 108 corresponding SpliceAI  $\Delta$  scores, only one exceeded the threshold of 0.20,  
230 specifically, a DL  $\Delta$  score of 0.29 (20 bp) for c.26T>G. It's important to note that this DL score was not  
231 physiologically relevant, as the predicted donor loss pertains to the GT dinucleotide at *SPINK1* coding  
232 positions c.7\_8. Additionally, it's worth mentioning that none of the four alternative *SPINK1*  
233 transcript isoforms (NM\_003122.5, NM\_001354966.2, XM\_047417625.1, and XM\_047417626.1 [43])  
234 utilizes the c.7\_8 GT dinucleotide as a splice donor site. The next highest score was a mere 0.11,  
235 specifically a DG score for c.29G>A. Therefore, except for the case of c.26T>G, a perfect correlation  
236 was observed between the FLGSA-derived and SpliceAI-predicted data in the context of the subset of  
237 known *SPINK1* coding SNVs.

238

### 239 **Selection of potential *SPINK1* coding SNVs for FLGSA**

240 Next, we aimed to select a new set of *SPINK1* coding SNVs for FLGSA analysis. We based our selection  
241 on the Illumina precomputed SpliceAI scores ([Supplementary Table S1](#)). Adhering to the  
242 methodological guidelines detailed in the *Methods* section, we carefully chose 35 SNVs. To enhance  
243 clarity, we will elucidate the selection process within the context of the four exons. Details of the 35  
244 chosen SNVs, alongside their corresponding Illumina precomputed SpliceAI scores, are provided in  
245 [Table 1](#).

246 Exon 1, comprising 55 coding nucleotides, exhibited AG and AL scores of zero for all 165 possible  
247 SNVs. As a result, our selection process relied on DG and DL scores. Initially, we included all three  
248 possible SNVs at the terminal position of exon 1 (i.e., c.55G>A, c.55G>C, and c.55G>T), whose DG and  
249 DL scores ranged from 0.33 to 0.51. Subsequently, from the remaining SNVs, we included the three  
250 with the highest DG scores (i.e., c.11C>G, 0.44; c.15C>T, 0.52; and c.43T>G, 0.38), along with two  
251 additional variants at c.43, specifically c.43T>C and c.43T>A. Regarding DL scores, those with positive  
252 values (referring to positions within either the 5'-UTR or coding sequence of exon 1) and some with  
253 negative values (referring to positions within the coding sequence of exon 1) were deemed  
254 physiologically irrelevant. Notably, all five variants with a physiologically relevant DL score of >0.10  
255 (i.e., c.11C>G, 0.45; c.15C>T, 0.13; c.55G>A, 0.40; c.55G>C, 0.34; and c.55G>T, 0.51) also possessed a  
256 DG score of at least 0.33, and hence, were already included in our analysis. Lastly, for the purpose of  
257 comparison, we included all three possible SNVs at c.9, all of which were predicted to have a DG  
258 score of 0.04.

259 Exon 2, encompassing 32 coding nucleotides, hosts 96 potential SNVs. Notably, two SNVs at the  
260 starting position (c.56) and all three SNVs at the final two positions (c.86 and c.87) of exon 2  
261 demonstrated AL and DL scores >0.20. As a result, we included all potential SNVs at these three



262 positions in the functional analysis. Additionally, the sole additional SNV meeting the criteria of both  
263 AL and DL scores >0.20 was c.84A>G. Hence, we incorporated this SNV, along with the other two  
264 possible SNVs at the c.84 position, into the functional analysis. Finally, four variants demonstrated a  
265 single score surpassing 0.20. These included c.64G>T with an AL score of 0.22, c.65G>T with an AL  
266 score of 0.31, c.80G>T with a DG score of 0.61, and c.85G>T with an AL score of 0.25. For the FLGSA  
267 assay, we selected the latter three variants for inclusion.

268 Exon 3, comprising 107 coding nucleotides, contains 321 potential SNVs. Among the 1284  
269 SpliceAI scores associated with these variants, most were zero. However, exceptions included an AG  
270 score of 0.13 for c.92A>G and a DG score of 0.26 for c.178T>G. In our FLGSA analysis, we prioritized  
271 c.178T>G. Additionally, we incorporated three SNVs at the beginning of exon 3 (c.88G>A, c.88G>C,  
272 and c.88G>T) and two at its end (c.194G>C and c.194G>T, with the note that c.194G>A had been  
273 previously analyzed in [7]).

274 Exon 4, with 46 coding nucleotides, contains 138 possible SNVs. All 552 corresponding SpliceAI  $\Delta$   
275 scores consistently remained at or near zero, with a maximum of 0.05, except for two cases: an AL  
276 score of 0.10 for c.195G>C and an AL score of 0.23 for c.195G>T. Since c.195 is the starting position  
277 of exon 4, we included all three possible SNVs at this position for FLGSA.

278

### 279 **FLGSA assay for the 35 prospectively selected *SPINK1* coding SNVs**

280 Then, we embarked on the functional characterization of the splicing impact of the aforementioned  
281 35 prospective *SPINK1* coding SNVs using the FLGSA assay. The outcomes, represented by RT-PCR  
282 band patterns in agarose gel analysis, are detailed in Fig. 2. In accordance with our common practice  
283 [27, 29, 30], we employed Sanger sequencing to determine the identity of RT-PCR bands whenever  
284 possible. This step carried particular significance for two primary reasons: (i) a seemingly WT RT-PCR  
285 band could differ from the genuine WT by only one or two base pairs [30, 32], and (ii) this  
286 information was pivotal for comparison with SpliceAI-predicted splice-altering sites in instances of  
287 aberrant splicing. Additionally, it's worth mentioning that the WT transcripts originating from cells  
288 transfected with the variant expression vectors consistently contained the corresponding coding  
289 SNVs.

290 However, we encountered challenges in sequencing several faint bands (e.g., the barely discernible  
291 band below the major band in c.11C>G; Fig. 2). These faint bands could potentially signify authentic  
292 aberrantly spliced transcripts or spurious amplifications. It is important to note two key considerations.  
293 Firstly, our prior investigation of 5' splice site GT>GC variants established that our FLGSA assay was  
294 capable of detecting as little as ~1% of normally spliced transcripts [32]. Secondly, we had previously  
295 postulated that a *SPINK1* variant is unlikely to have pathological relevance if it caused a <10% loss of

296 normal function (or retained >90% normal function) [25]. Therefore, we excluded these barely visible  
297 RT-PCR bands from further consideration.

298 A concise summary of the FLGSA findings, including comparative levels of aberrant versus WT  
299 transcripts where applicable, can be found in [Table 1](#).

300

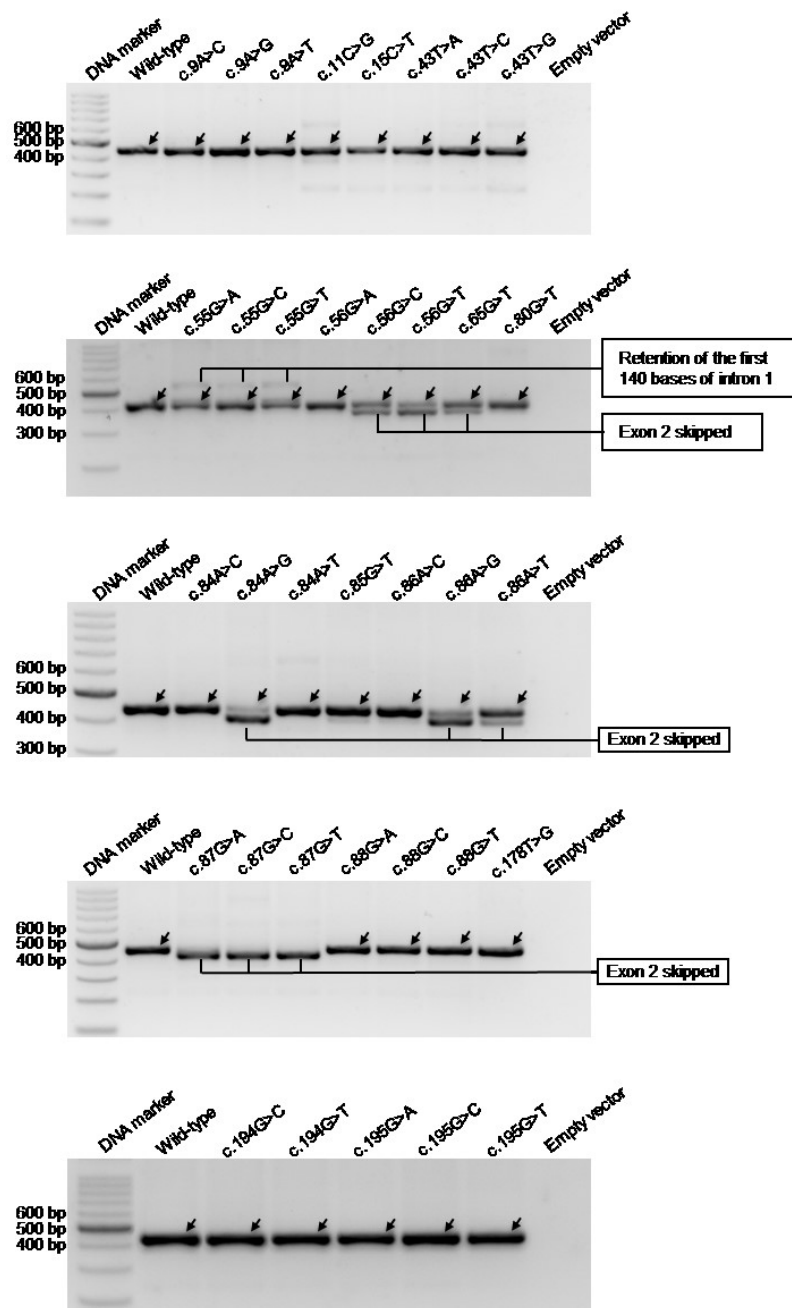

301  
302 **Figure 2.** RT-PCR results for the FLGSA analysis of 35 potential *SPINK1* coding variants. In all panels,  
303 arrows indicate wild-type transcripts, all of which were confirmed by Sanger sequencing. FLGSA, full-  
304 length gene splicing assay. RT-PCR, reverse transcription-PCR.

305

306

### 307 **Correlation of FLGSA data with SpliceAI predictions for the 35 prospectively analyzed SNVs**

308 Subsequently, we conducted a thorough analysis to correlate the FLGSA data generated for the  
309 prospectively examined 35 SNVs with their corresponding Illumina precomputed SpliceAI scores  
310 (Table 1). After discarding physiologically irrelevant DL scores linked to various SNVs in exon 1, we  
311 observed a significant pattern in relation to the threshold  $\Delta$  scores of 0.20 and 0.80 [11]. Specifically,  
312 all variants with a  $\Delta$  score not exceeding 0.20 exclusively produced WT transcripts. Conversely, every  
313 variant with a  $\Delta$  score above 0.80 consistently led to the production of aberrant variants.

314 Establishing a clear correlation between the presence or absence of aberrant transcripts and  
315 intermediate  $\Delta$  scores (0.20 to 0.80) was challenging. However, a notable pattern emerged upon  
316 analyzing  $\Delta$  scores for SNVs at positions c.55, c.56, and c.86. Each of these positions underwent  
317 FLGSA analysis, with at least two of the three possible SNVs at each position generating both  
318 aberrant and WT transcripts. For a more focused analysis, we will compare the DL scores associated  
319 with these SNVs. At position c.55, all three SNVs yielded both aberrant and WT transcripts (Table 1).  
320 Notably, the variant with the lowest DL score, c.55G>C (0.34), also had the lowest ratio of aberrant to  
321 WT transcripts. At c.56, the c.56G>A variant, with no scores above 0.20, produced only WT  
322 transcripts. In contrast, c.56G>C and c.56G>T, with DL scores of 0.29 and 0.46 respectively, yielded  
323 both transcript types, and their aberrant/WT transcript ratios aligned with their DL scores. Regarding  
324 c.86, c.86A>C, which had the lowest DL score (0.23), did not produce aberrant transcripts.  
325 Conversely, c.86A>G, with the highest DL score (0.67), resulted in a significantly higher aberrant/WT  
326 transcript ratio of 4.13/1. Interestingly, c.86A>T, with a lower DL score (0.57) than c.86A>G, led to a  
327 much lower aberrant/WT transcript ratio (1/5.31) in comparison.

328 We then hypothesized that conducting a comprehensive cross-comparison of various events  
329 within the same exon context might yield valuable insights into the remaining intermediate  $\Delta$  scores.  
330 We explored this hypothesis within the contexts of the four exons.

331

#### 332 ***Exon 1***

333 All three SNVs at the last nucleotide of exon 1, c.55, exhibited DL scores ranging from 0.34 to 0.51  
334 and DG scores between 0.33 and 0.37 (Table 1). Based on their corresponding mRNA positions, these  
335 SNVs were predicted to disrupt the physiological GT splice donor site at positions c.55+1\_2 and  
336 activate an upstream cryptic splice donor site within exon 1 (i.e., the GT dinucleotide at position  
337 c.7\_8) (Fig. 3a). This would result in a significantly shortened transcript that lacked the last 49  
338 nucleotides (i.e., c.7 to c.55) of exon 1. Interestingly, our FLGSA assay detected an aberrant transcript  
339 that retained the first 140 bases of intron 1 (Fig. 2), due to the activation of a downstream cryptic GT  
340 splice site located at the deep intron 1 region (precisely at c.55+141\_142) (Fig. 3a).

341

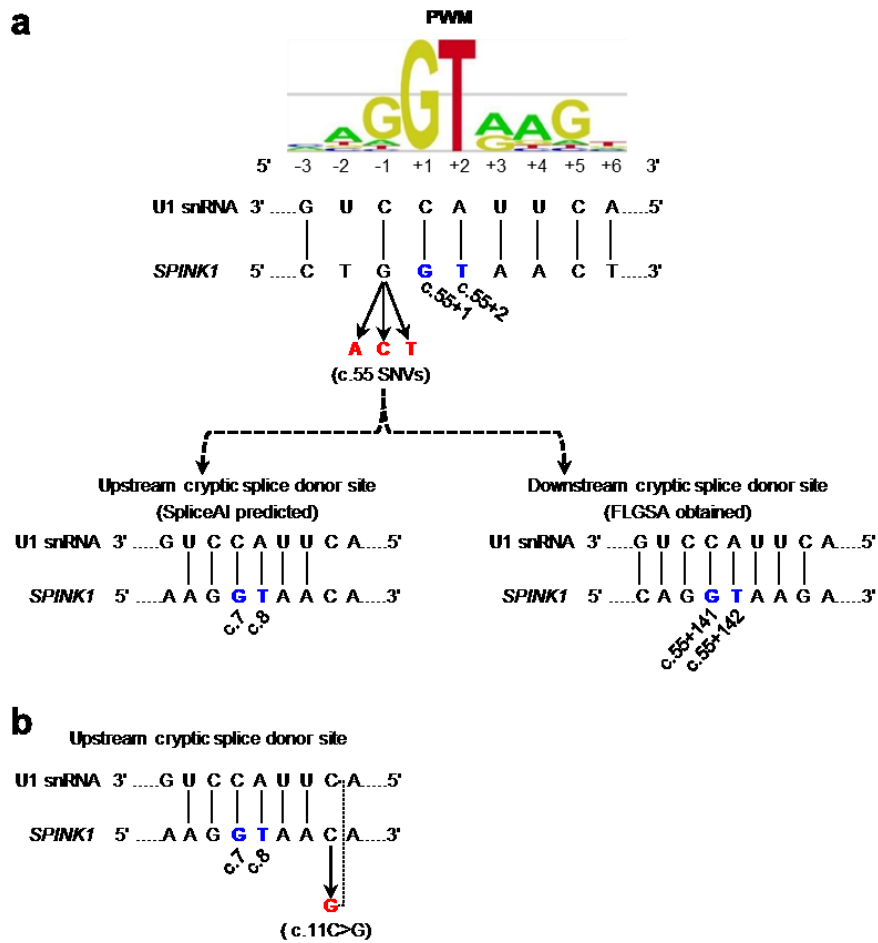

342

343 **Figure 3.** Interpretation of the three c.55 SNVs and the c.11C>G variant in exon 1 by reference to  
 344 SpliceAI predictions and FLGSA results. **a** Illustration of the (partial) disruption of the physiological 5'  
 345 splice donor site of *SPINK1* intron 1 caused by the three potential SNVs at the last nucleotide of exon  
 346 1 (c.55). This disruption is shown in the context of the corresponding 9-bp 5' splice signal sequence,  
 347 which interacts with the 3'-GUCCAUUCA-5' sequence at the 5' end of U1snRNA. SpliceAI predicted this  
 348 disruption (DL scores, 0.34 to 0.51) and the activation of an upstream cryptic splice donor site within  
 349 exon 1 (DG scores, 0.33 and 0.37). However, our FLGSA assay revealed the activation of a downstream  
 350 cryptic splice donor site. Vertical lines indicate paired bases between the 9-bp 5' splice signal sequence  
 351 and the 5' end sequence of U1snRNA. The GT dinucleotides involved are highlighted in blue, with their  
 352 positions (in accordance with NM\_001379610.1) indicated. The 9-bp 5' splice site signal sequence  
 353 position weight matrices (PWM) were sourced from Leman et al. [44], an Open Access article  
 354 distributed under the terms of the Creative Commons Attribution Non-Commercial License. Note that  
 355 the 9-bp 5' splice signal sequences, whether in the context of the consensus sequence or *SPINK1*  
 356 sequences, are presented in DNA. **b** Illustration of the c.11C>G variant in the context of the  
 357 aforementioned upstream cryptic splice donor site. A dotted line represents the new base pairing  
 358 derived from the variant, enhancing the interaction between the 9-bp 5' splice signal sequence and  
 359 the 5' end sequence of U1snRNA.  
 360

361 We performed two additional analyses to address the discrepancy between *in silico* predictions  
362 and experimental data. First, considering that the Illumina precomputed scores were created using a  
363 maximum distance of 50 bp, we reevaluated the three possible c.55 SNVs using SpliceAI with an  
364 extended distance of 10,000 bp and the hg38 sequence [40]. Although the resulting DG and DL scores  
365 showed slight variations compared to the Illumina precomputed scores ([Supplementary Table S1](#)),  
366 they did not alter the predicted splicing outcomes. Second, we examined the predicted and  
367 experimentally obtained cryptic GT donor site in the context of the 9-bp 5' splice signal sequence and  
368 their pairing with the 3'-GUCCAUUCA-5' sequence at the 5' end of U1snRNA (see [32] and references  
369 therein). Interestingly, the experimentally identified cryptic GT donor site was found within a 9-bp 5'  
370 splice signal sequence that exhibited 8 bp complementarity with the 9 bp U1snRNA sequence. In  
371 contrast, the *in silico* predicted cryptic GT donor site resided within a 9-bp 5' splice signal sequence  
372 with only 6 bp complementarity to the 9 bp U1snRNA sequence ([Fig. 3a](#)). It's noteworthy that this *in*  
373 *silico* predicted cryptic GT donor site coincides with the previously discussed false physiological GT  
374 dinucleotide at position c.7\_8, which was related to the DL score of the known c.26T>G variant (see  
375 *Retrospective correlation of FLGSA data with SpliceAI predictions for known SPINK1 coding SNVs*).  
376 Based on these new findings, we speculate that SpliceAI might have favored the nearby cryptic donor  
377 site in exon 1 over the more distant cryptic donor site in intron 1.

378 Another variant in exon 1, c.11C>G, was predicted to induce a splicing effect similar to the three  
379 potential c.55 SNVs based on the SpliceAI scores. Interestingly, it displayed even higher DG and DL  
380 scores than those of the three potential c.55 SNVs ([Table 1](#)). However, the FLGSA analysis did not  
381 reveal aberrant transcripts associated with the c.11C>G variant. As illustrated in [Fig. 3b](#), c.11C>G  
382 resides within the 9-bp 5' splice signal sequence linked to the previously mentioned cryptic 5' splice  
383 GT donor site at positions c.7\_8. Notably, it increased sequence complementarity with the 9-bp  
384 U1snRNA sequence from 6 bp to 7 bp compared to the WT sequence. It's essential to highlight that,  
385 in this scenario, the physiological intron 1 splice donor signal sequence remains unaltered. Bearing  
386 this in mind, we conjecture that the enhanced sequence complementarity brought about by the  
387 c.11C>G variant may have encountered difficulties in competing with the intact physiological intron 1  
388 splice donor signal sequence, which exhibited 8 bp complementarity with U1snRNA ([Fig. 3a](#)).

389 Shifting our focus to other variants, let's consider c.15C>T, which had the highest DG score (0.52)  
390 among all possible coding SNVs in exon 1, but it only had a DL score of 0.13. We also have c.43T>G,  
391 which had a DG score of 0.38 but a DL score of zero. Importantly, neither of these variants resulted in  
392 the generation of aberrant transcripts ([Table 1](#)). Drawing parallels with the previously discussed  
393 c.11C>G variant, we propose that their predicted cryptic 5' splice donor sites, located within the  
394 coding sequence of exon 1, may not have effectively competed against the intact physiological intron  
395 1 splice donor signal sequence.

396 **Exons 2-4**

397 Moving on to exons 2-4, two variants warrant closer examination: c.80G>T in exon 2 and c.178T>G in  
398 exon 3. The former variant displayed a DG score of 0.61 but a DL score of only 0.10, while the latter  
399 had a DG score of 0.26 but a DL score of zero (Table 1). Our FLGSA analysis did not produce any  
400 aberrant transcripts associated with either of these variants. In line with our earlier observations  
401 concerning variants in exon 1, such as c.11C>G and c.15C>T, we propose that the predicted cryptic 5'  
402 splice donor sites may not have effectively competed with the intact physiological intron 2 and intron  
403 3 splice donor signal sequences, respectively.

404

405 **Extrapolation to unanalyzed *SPINK1* coding SNVs**

406 Finally, we addressed a critical question: Can we reasonably interpret the potential splicing effects of  
407 the 658 *SPINK1* coding variants that have not yet undergone functional analysis, based on insights  
408 derived from the cross-correlation of FLGSA data and SpliceAI predictions of the 27 known and 35  
409 newly analyzed SNVs? To accurately answer this question, we initially evaluated whether the Illumina  
410 precomputed scores significantly deviated from those calculated using a distance of 10,000 bp and  
411 the hg38 sequence. Consequently, we manually acquired these latter scores from [40] for all SNVs  
412 that underwent FLGSA. While we did observe slight disparities between the two datasets for many  
413 SNVs (see Supplementary Table S1), it's crucial to emphasize that these variations were not expected  
414 to result in any changes to the predicted splicing outcomes. Thus, we proceeded confidently, utilizing  
415 the Illumina precomputed scores for our subsequent discussions within the contexts of the four  
416 exons. Our primary focus remained on unanalyzed SNVs with a  $\Delta$  score falling within the range of  
417 0.20 to 0.30. This choice was motivated by two factors: (i) we have already included all variants with  
418 a physiologically relevant  $\Delta$  score exceeding 0.30 for FLGSA analysis, and (ii) a  $\Delta$  score below 0.20 is  
419 highly unlikely to impact splicing.

420

421 **Exon 1**

422 In exon 1, we identified nine unanalyzed SNVs with a physiologically plausible  $\Delta$  score of  $\geq 0.20$   
423 (c.3G>A, c.4A>C, c.11C>T, c.14G>T, c.28A>T, c.29G>T, c.36G>A, c.37G>T, and c.45G>T). Notably,  
424 these scores consistently fall within the DG type, ranging from 0.20 to 0.24. Interestingly, all of these  
425 variants were predicted to have cryptic GT splice donor sites that coincide with the previously  
426 discussed GT at c.7\_8. Additionally, these variants exhibited low DL scores, spanning from 0 to 0.12.  
427 When comparing these scores with those of the functionally analyzed exon 1 SNVs (see Table 1), we  
428 can conclude that none of these nine variants had any discernible impact on splicing.

429

430

431 **Exon 2**

432 In exon 2, we identified only two unanalyzed SNVs with a physiologically plausible  $\Delta$  score of  $\geq 0.20$   
433 (c.64G>T and c.81A>T). Both scores are identical (0.22) and belong to the AL type. AG and DG scores  
434 of the two variants are zero, while their DL scores are similar (0.11-0.13). Evaluation of the  
435 corresponding mRNA positions associated with the AL and DL scores demonstrated that their  
436 predicted splicing outcomes would result in exon 2 skipping.

437 Of the functionally analyzed exon 2 variants, c.85G>T most closely resembles c.64G>T and  
438 c.81A>T in terms of the  $\Delta$  scores. However, c.85G>T had both slightly higher AL and DL scores than  
439 c.64G>T and c.81A>T (AL, 0.25 vs. 0.22; DL, 0.17 vs. 0.11-0.13) and produced no aberrant transcripts.  
440 c.65G>T is the next variant that most closely resembles c.64G>T and c.81A>T. c.65G>T had a higher  
441 AL score (0.31) but equal DL score (0.17) compared to c.85G>T and generated aberrant transcripts.  
442 However, the aberrant transcript was generated alongside the WT transcript, and its amount was  
443 much less than that of the WT transcript (ratio of 1:5.16).

444 Based on this cross-comparison, we can conclude that c.64G>T and c.81A>T are highly unlikely to  
445 generate aberrant transcripts.

446

447 **Exons 3 and 4**

448 In exon 3 and 4, none of the functionally analyzed SNVs generated aberrant transcripts. Moreover,  
449 except for c.92A>G in exon 3, which had an AG score of 0.13, none of the unanalyzed SNVs had a  
450 SpliceAI score exceeding 0.05. Consequently, all SNVs in these two exons were considered not to  
451 impact splicing.

452

453 **Further validation**

454 While we had confidence in our above extrapolation, we opted for additional validation. Therefore,  
455 we selected five variants with the highest scores among those not previously functionally analyzed  
456 within exons 1, 2, and 3 for FLGSA analysis. Specifically, they included two of the nine exon 1 variants  
457 mentioned above (c.29G>T and c.37G>T), the two exon 2 variants mentioned earlier (c.64G>T and  
458 c.81A>T), and the exon 3 variant c.92A>G (Table 2). As shown in Fig. 4, all five variants exclusively  
459 produced WT transcripts, thereby validating our extrapolation.

460

461 **Overview of splice-altering coding SNVs in the *SPINK1* gene**

462 Overall, our study covers 67 *SPINK1* coding SNVs, accounting for 9.3% of all 720 possible coding SNVs  
463 and affecting 46 (19.2%) of 240 coding nucleotides. Out of these 67 SNVs, 12 were experimentally  
464 found to impact splicing. Based on a comprehensive cross-correlation of FLGSA-obtained and  
465 SpliceAI-predicted data, we conclude that all unanalyzed potential coding SNVs in the *SPINK1* gene

466 are unlikely to have a significant effect on splicing. Therefore, the 12 splice-altering events identified  
 467 in our study represent the totality of splice-altering events among the 720 potential coding SNVs in  
 468 the *SPINK1* gene.

469

470 **Table 2.** Selected five *SPINK1* coding SNVs for further validation\*

| Exon | Variant <sup>a</sup> |                   | Illumina precomputed SpliceAI scores <sup>b</sup> |              |              |               |
|------|----------------------|-------------------|---------------------------------------------------|--------------|--------------|---------------|
|      | Nucleotide change    | Amino acid change | AG                                                | AL           | DG           | DL            |
| 1    | c.29G>T              | p.Ser10Ile        | 0.00                                              | 0.00         | 0.24 (23 bp) | 0.10 (-26 bp) |
| 1    | c.37G>T              | p.Ala13Ser        | 0.00                                              | 0.00         | 0.23 (31 bp) | 0.08          |
| 2    | c.64G>T              | p.Gly22*          | 0.00                                              | 0.22 (8 bp)  | 0.00         | 0.11 (-23 bp) |
| 2    | c.81A>T              | p.(=)             | 0.00                                              | 0.22 (25 bp) | 0.00         | 0.13 (-6 bp)  |
| 3    | c.92A>G              | p.Lys31Arg        | 0.13 (-1 bp)                                      | 0.00         | 0.00         | 0.00          |

471 *Abbreviations:* AG, acceptor gain; AL, acceptor loss; DG, donor gain; DL, donor loss; FLGSA, full-length  
 472 gene splicing assay; SNVs, single-nucleotide variants

473 \*All five variants exclusively produced wild-type transcripts through FLGSA (see Fig. 4).

474 <sup>a</sup>*SPINK1* mRNA reference sequence: NM\_001379610.1.

475 <sup>b</sup>In parentheses: corresponding pre-mRNA positions are provided for  $\Delta$  scores  $\geq 0.10$ . Positive and  
 476 negative pre-mRNA positions indicate positions 5' and 3' to the variant position in terms of the  
 477 gene's sense strand.

478

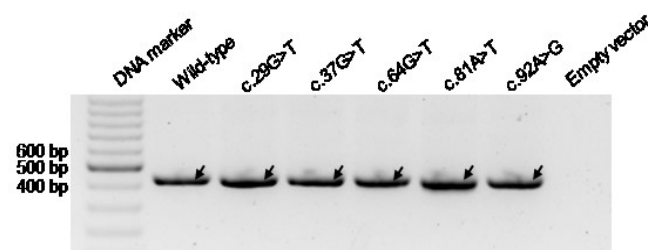

479

480 **Figure 4.** RT-PCR results for the validation analysis of five potential *SPINK1* coding variants through  
 481 FLGSA. Arrows indicate wild-type transcripts, all of which were confirmed by Sanger sequencing.  
 482 FLGSA, full-length gene splicing assay. RT-PCR, reverse transcription-PCR.

483

484 Among the 12 splice-altering events, nine produced both WT and aberrant transcripts, while the  
 485 remaining three exclusively generated aberrant transcripts. These splice-altering SNVs were  
 486 predominantly found in exons 1 and 2, particularly affecting the first and/or last coding nucleotide of  
 487 each exon. Among the splice-altering events, 11 were missense variants, accounting for 2.17% of the



488 506 potential missense variants, while one was synonymous, accounting for 0.61% of the 164  
489 potential synonymous variants (see [Table 3](#)).

490

491 **Table 3.** Summary of splice-altering coding SNVs in the *SPINK1* gene

| Variant types                                 | Total potential SNVs<br>(a) | Splice-altering SNVs<br>(b) | Percentage (b/a) |
|-----------------------------------------------|-----------------------------|-----------------------------|------------------|
| Translation initiation<br>codon <sup>a</sup>  | 9                           | 0                           | 0                |
| Missense                                      | 506                         | 11                          | 2.17             |
| Synonymous                                    | 164                         | 1                           | 0.61             |
| Nonsense                                      | 32                          | 0                           | 0                |
| Translation<br>termination codon <sup>a</sup> | 9                           | 0                           | 0                |
| Total                                         | 720                         |                             | 1.67             |

492 *Abbreviation:* SNVs, single-nucleotide variants

493 <sup>a</sup>SNVs occurring within either the translation initiation or termination codon are referred to simply as  
494 "translation initiation codon" or "translation termination codon" variants.

495

## 496 Discussion

497 In this study, we leveraged the well-established FLGSA assay [7, 27-31] in conjunction with SpliceAI  
498 [11] to explore the prospective interpretation of splicing effects for all potential coding SNVs within  
499 the *SPINK1* gene, following the structured progression outlined in [Fig.1](#).

500 Our analysis unveiled intriguing discrepancies between SpliceAI predictions and the FLGSA data.  
501 Notably, SpliceAI erroneously predicted that several exon 1 SNVs would disrupt a splice donor site  
502 within the coding sequence of exon 1 (see [Table 1](#)). These predictions conflicted with two critical  
503 pieces of evidence: Firstly, only one known *SPINK1* transcript isoform, NM\_001379610.1, is  
504 expressed in the exocrine pancreas [22, 23]. Secondly, none of the other four alternative *SPINK1*  
505 transcript isoforms [43] were found to utilize a GT dinucleotide within the exon 1 coding sequence as  
506 a splice donor site. The convergence of these findings, along with the results of our FLGSA assay,  
507 strongly suggests that these SpliceAI predictions were indeed spurious.

508 Another significant discrepancy centered around the splicing outcomes of the three SNVs at c.55,  
509 specifically involving the last nucleotide of exon 1. SpliceAI predicted the activation of an upstream  
510 cryptic GT dinucleotide at c.7\_8, whereas our FLGSA assay identified the activation of a downstream  
511 cryptic GT dinucleotide located at c.55+141\_142. Intriguingly, the SpliceAI-predicted cryptic GT

512 dinucleotide coincided with one of the aforementioned erroneous splice GT donor sites, highlighting  
513 a recurring issue with SpliceAI predictions in the context of exon 1 coding sequences. Notably, our  
514 experimentally identified cryptic GT dinucleotide exhibited stronger complementarity with the 3'-  
515 GUCCAUUCA-5' sequence at the 5' end of U1snRNA, featuring eight complementary bases, in  
516 contrast to the SpliceAI-predicted cryptic GT dinucleotide with only six complementary bases (refer  
517 to Fig. 3a). It's important to mention that our experimentally identified cryptic GT dinucleotide is  
518 situated more distantly (141 bp) from c.55 than the SpliceAI-predicted cryptic GT dinucleotide (47  
519 bp), potentially explaining why the latter was not correctly predicted by SpliceAI. Additionally, it's  
520 worth acknowledging that variants in exon 1 are not readily amenable to analysis through the  
521 commonly used minigene assay [8], and the activation of cryptic donor or splice sites in deep intronic  
522 regions may often elude detection via a minigene assay.

523       Except for the aforementioned discrepancies, we found a robust correlation between FLGSA data  
524 and SpliceAI predictions, particularly concerning the 0.20 and 0.80 threshold scores and the findings  
525 for all possible SNVs at c.55, c.56, and c.86. While the relationship between FLGSA data and SpliceAI  
526 scores below 0.20 or above 0.80 tended to be straightforward, deciphering the correlation between  
527 FLGSA data and intermediate SpliceAI scores within the range of 0.20 to 0.80 presented challenges.  
528 Nevertheless, our efforts to correlate these intermediate SpliceAI scores with FLGSA findings yielded  
529 intriguing insights. For instance, variants with intermediate SpliceAI scores, when leading to aberrant  
530 transcripts, often produced a mix of aberrant and WT transcripts. Furthermore, in the case of all  
531 possible SNVs at c.55, c.56, and c.86, intermediate SpliceAI scores seemed to correlate with the  
532 aberrant/WT transcript ratio. These mutually reinforcing data were instrumental in guiding a cross-  
533 comparison concerning unanalyzed variants, allowing us to reasonably extrapolate that none of the  
534 unanalyzed coding SNVs in the *SPINK1* gene are likely to exert a significant effect on splicing.

535       To the best of our knowledge, this study represents the first attempt to prospectively interpret all  
536 potential coding SNVs in a disease-associated gene. Our findings unveiled that within the *SPINK1*  
537 gene, 2.17% of all potential missense variants, 0.61% of all potential synonymous variants, but none  
538 of the potential nonsense variants have an impact on splicing. In total, 1.67% (12 out of 720) of all  
539 potential coding SNVs in the *SPINK1* gene were found to alter splicing.

540       Among the 12 splice-altering variants, five (c.84A>G, c.86A>G, c.87G>A, c.87G>C, and c.87G>T)  
541 led exclusively or predominantly to aberrant transcripts. These five variants can be classified as  
542 “pathogenic” and would have been mislabeled as silent or missense variants without the FLGSA  
543 assay. The remaining seven variants exhibited aberrant to WT transcript ratios ranging from 1/21.72  
544 to 2.97/1. In all these cases, the aberrant transcripts—either retaining part of intron 1 or omitting the  
545 entire exon 2—would yield a non-functional product. However, when the aberrant transcript ratio is

546 substantially lower than that of the WT transcript, the variant in question (e.g., c.55G>C with a ratio  
547 of 1/21.72) may not be of pathogenic significance.

548 It's important to acknowledge the limitations of our FLGSA assay. For instance, like the minigene  
549 assay, our experiments required transfected cells, which may not always faithfully recapitulate *in vivo*  
550 conditions. However, findings from correlation of our FLGSA data with SpliceAI and cross-  
551 comparisons of our FLGSA data across different variants gave strong support to the validity of our  
552 FLGSA assay.

553

## 554 **Conclusions**

555 By integrating the FLGSA assay with SpliceAI predictions, our study presents compelling evidence that  
556 1.67% of potential *SPINK1* coding SNVs exert a discernible impact on splicing outcomes. Our findings  
557 underscore the critical necessity of conducting splicing analysis within the broader genomic context  
558 of the target gene, a perspective that can reveal splicing outcomes often missed by conventional  
559 minigene assays. Additionally, we emphasize the inherent uncertainties associated with intermediate  
560 SpliceAI scores (ranging from 0.20 to 0.80), highlighting the critical role of functional analysis in  
561 variant interpretation. Finally, our approach offers potential implications for transitioning from  
562 "retrospective" to "prospective" variant analysis in other disease genes, accelerating the full  
563 realization of precision medicine in the whole exome sequencing or whole genome sequencing era.

564

## 565 **Funding**

566 This research was funded by the National Natural Science Foundation of China (81800569 to HW,  
567 82000611 to J-HL, and 82000606 to X-YT), the Shanghai Pujiang Program (2020PJD061 to J-HL), the  
568 Shanghai Sailing Program (20YF1459400 to X-YT). Support for this study also came from the Institut  
569 National de la Santé et de la Recherche Médicale (INSERM), the Association des Pancréatites  
570 Chroniques Héritaires and the Association Gaétan Saleün, France. The funding bodies did not play  
571 any role in the study design, collection, analysis, and interpretation of data or the writing of the  
572 article and the decision to submit it for publication.

573

## 574 **Authors' contributions**

575 HW, JHL, XYT, and WBZ designed the study, conducted the experiments, and contributed to paper  
576 writing. SS acquired the Illumina precomputed SpliceAI scores. EM, YF, GLC, and CF contributed to  
577 the conception of the study. ZL was involved in study conception and coordinated the experiments.  
578 JMC conceived the study, obtained the latest SpliceAI scores, and wrote the manuscript. All authors  
579 participated in data review, revised the manuscript with critical intellectual input, approved the

580 submitted version, and agreed to be personally accountable for the author's own contributions and  
581 to ensure that questions related to the accuracy or integrity of any part of the work, even ones in  
582 which the author was not personally involved, are appropriately investigated, resolved, and the  
583 resolution documented in the literature.

584

## 585 **Acknowledgements**

586 The authors are grateful to GENEWIZ Biotech Co. (Suzhou, China) for their assistance in preparing the  
587 variant expression vectors.

588

## 589 **References**

- 590 1. Manning KS, Cooper TA. The roles of RNA processing in translating genotype to phenotype. *Nat Rev Mol Cell*  
591 *Biol.* 2017;18(2):102-14.
- 592 2. Cartegni L, Chew SL, Krainer AR. Listening to silence and understanding nonsense: exonic mutations that  
593 affect splicing. *Nat Rev Genet.* 2002;3(4):285-98.
- 594 3. Sarkar A, Panati K, Narala VR. Code inside the codon: The role of synonymous mutations in regulating  
595 splicing machinery and its impact on disease. *Mutat Res Rev Mutat Res.* 2022;790:108444.
- 596 4. Aicher JK, Jewell P, Vaquero-Garcia J, Barash Y, Bhoj EJ. Mapping RNA splicing variations in clinically  
597 accessible and nonaccessible tissues to facilitate Mendelian disease diagnosis using RNA-seq. *Genet Med.*  
598 2020;22(7):1181-90.
- 599 5. Wai HA, Lord J, Lyon M, Gunning A, Kelly H, Cibir P, et al. Blood RNA analysis can increase clinical diagnostic  
600 rate and resolve variants of uncertain significance. *Genet Med.* 2020;22(6):1005-14.
- 601 6. Gaildrat P, Killian A, Martins A, Tournier I, Frebourg T, Tosi M. Use of splicing reporter minigene assay to  
602 evaluate the effect on splicing of unclassified genetic variants. *Methods Mol Biol.* 2010;653:249-57.
- 603 7. Wu H, Boulling A, Cooper DN, Li ZS, Liao Z, Chen JM, et al. *In vitro* and *in silico* evidence against a significant  
604 effect of the *SPINK1* c.194G>A variant on pre-mRNA splicing. *Gut.* 2017;66(12):2195-6.
- 605 8. Lin JH, Wu H, Zou WB, Masson E, Fichou Y, Le Gac G, et al. Splicing outcomes of 5' splice site GT>GC variants  
606 that generate wild-type transcripts differ significantly between full-length and minigene splicing assays.  
607 *Front Genet.* 2021;12:701652.
- 608 9. Fu XD, Ares M, Jr. Context-dependent control of alternative splicing by RNA-binding proteins. *Nat Rev*  
609 *Genet.* 2014;15(10):689-701.
- 610 10. Drexler HL, Choquet K, Churchman LS. Splicing kinetics and coordination revealed by direct nascent RNA  
611 sequencing through nanopores. *Mol Cell.* 2020;77(5):985-98.
- 612 11. Jaganathan K, Kyriazopoulou Panagiotopoulou S, McRae JF, Darbandi SF, Knowles D, Li YI, et al. Predicting  
613 splicing from primary sequence with deep learning. *Cell.* 2019;176(3):535-48.
- 614 12. Lord J, Baralle D. Splicing in the diagnosis of rare disease: advances and challenges. *Front Genet.*  
615 2021;12:689892.
- 616 13. Dawes R, Joshi H, Cooper ST. Empirical prediction of variant-activated cryptic splice donors using  
617 population-based RNA-Seq data. *Nat Commun.* 2022;13(1):1655.
- 618 14. Masson E, Zou WB, Pu N, Rebours V, Genin E, Wu H, et al. Classification of *PRSS1* variants responsible for  
619 chronic pancreatitis: An expert perspective from the Franco-Chinese GREPAN study group. *Pancreatol.*  
620 2023;23(5):491-506.
- 621 15. Walker LC, Hoya M, Wiggins GAR, Lindy A, Vincent LM, Parsons MT, et al. Using the ACMG/AMP framework  
622 to capture evidence related to predicted and observed impact on splicing: Recommendations from the  
623 ClinGen SVI Splicing Subgroup. *Am J Hum Genet.* 2023;110(7):1046-67.
- 624 16. Richards S, Aziz N, Bale S, Bick D, Das S, Gastier-Foster J, et al. Standards and guidelines for the  
625 interpretation of sequence variants: a joint consensus recommendation of the American College of Medical  
626 Genetics and Genomics and the Association for Molecular Pathology. *Genet Med.* 2015;17(5):405-24.
- 627 17. Shendure J, Findlay GM, Snyder MW. Genomic medicine-progress, pitfalls, and promise. *Cell.*  
628 2019;177(1):45-57.

- 629 18. Starita LM, Ahituv N, Dunham MJ, Kitzman JO, Roth FP, Seelig G, et al. Variant interpretation: functional  
630 assays to the rescue. *Am J Hum Genet.* 2017;101(3):315-25.
- 631 19. Gasperini M, Starita L, Shendure J. The power of multiplexed functional analysis of genetic variants. *Nat*  
632 *Protoc.* 2016;11(10):1782-7.
- 633 20. Findlay GM, Daza RM, Martin B, Zhang MD, Leith AP, Gasperini M, et al. Accurate classification of *BRCA1*  
634 variants with saturation genome editing. *Nature.* 2018;562(7726):217-22.
- 635 21. Witt H, Luck W, Hennies HC, Classen M, Kage A, Lass U, et al. Mutations in the gene encoding the serine  
636 protease inhibitor, Kazal type 1 are associated with chronic pancreatitis. *Nat Genet.* 2000;25(2):213-6.
- 637 22. Yamamoto T, Nakamura Y, Nishide J, Emi M, Ogawa M, Mori T, et al. Molecular cloning and nucleotide  
638 sequence of human pancreatic secretory trypsin inhibitor (*PSTI*) cDNA. *Biochem Biophys Res Commun.*  
639 1985;132(2):605-12.
- 640 23. Horii A, Kobayashi T, Tomita N, Yamamoto T, Fukushige S, Murotsu T, et al. Primary structure of human  
641 pancreatic secretory trypsin inhibitor (*PSTI*) gene. *Biochem Biophys Res Commun.* 1987;149(2):635-41.
- 642 24. Hegyi E, Sahin-Tóth M. Genetic risk in chronic pancreatitis: the trypsin-dependent pathway. *Dig Dis Sci.*  
643 2017;62(7):1692-701.
- 644 25. Masson E, Zou WB, Genin E, Cooper DN, Le Gac G, Fichou Y, et al. Expanding ACMG variant classification  
645 guidelines into a general framework. *Hum Genomics.* 2022;16(1):31.
- 646 26. Boulling A, Chen JM, Callebaut I, Férec C. Is the *SPINK1* p.Asn34Ser missense mutation *per se* the true culprit  
647 within its associated haplotype? *WebmedCentral GENETICS.* 2012;3:WMC003084.
- 648 27. Zou WB, Boulling A, Masson E, Cooper DN, Liao Z, Li ZS, et al. Clarifying the clinical relevance of *SPINK1*  
649 intronic variants in chronic pancreatitis. *Gut.* 2016;65(5):884-6.
- 650 28. Zou WB, Masson E, Boulling A, Cooper DN, Li ZS, Liao Z, et al. Digging deeper into the intronic sequences of  
651 the *SPINK1* gene. *Gut.* 2016;65(6):1055-6.
- 652 29. Zou WB, Wu H, Boulling A, Cooper DN, Li ZS, Liao Z, et al. *In silico* prioritization and further functional  
653 characterization of *SPINK1* intronic variants. *Hum Genomics.* 2017;11(1):7.
- 654 30. Tang XY, Lin JH, Zou WB, Masson E, Boulling A, Deng SJ, et al. Toward a clinical diagnostic pipeline for  
655 *SPINK1* intronic variants. *Hum Genomics.* 2019;13(1):8.
- 656 31. Wu H, Boulling A, Cooper DN, Li ZS, Liao Z, Férec C, et al. Analysis of the impact of known *SPINK1* missense  
657 variants on pre-mRNA splicing and/or mRNA stability in a full-length gene assay. *Genes (Basel).*  
658 2017;8(10):263.
- 659 32. Lin JH, Tang XY, Boulling A, Zou WB, Masson E, Fichou Y, et al. First estimate of the scale of canonical 5'  
660 splice site GT>GC variants capable of generating wild-type transcripts. *Hum Mutat.* 2019;40(10):1856-73.
- 661 33. Kume K, Masamune A, Kikuta K, Shimosegawa T. [-215G>A; IVS3+2T>C] mutation in the *SPINK1* gene causes  
662 exon 3 skipping and loss of the trypsin binding site. *Gut.* 2006;55(8):1214.
- 663 34. Chen JM, Lin JH, Masson E, Liao Z, Férec C, Cooper DN, et al. The experimentally obtained functional impact  
664 assessments of 5' splice site GT>GC variants differ markedly from those predicted. *Curr Genomics.*  
665 2020;21(1):56-66.
- 666 35. Ota Y, Masamune A, Inui K, Kume K, Shimosegawa T, Kikuyama M. Phenotypic variability of the homozygous  
667 IVS3+2T>C mutation in the serine protease inhibitor Kazal type 1 (*SPINK1*) gene in patients with chronic  
668 pancreatitis. *Tohoku J Exp Med.* 2010;221(3):197-201.
- 669 36. Venet T, Masson E, Talbotec C, Billiemaz K, Touraine R, Gay C, et al. Severe infantile isolated exocrine  
670 pancreatic insufficiency caused by the complete functional loss of the *SPINK1* gene. *Hum Mutat.*  
671 2017;38(12):1660-5.
- 672 37. Morales J, Pujar S, Loveland JE, Astashyn A, Bennett R, Berry A, et al. A joint NCBI and EMBL-EBI transcript  
673 set for clinical genomics and research. *Nature.* 2022;604(7905):310-5.
- 674 38. Illumina precomputed SpliceAI scores. <https://github.com/Illumina/SpliceAI> (version 1.3). Accessed 18  
675 February 2020.
- 676 39. SpliceAI Virtual website. <https://mobidetails.iurc.montp.inserm.fr/MD>. Accessed 29 September 2023.
- 677 40. SpliceAI Lookup. <https://spliceailookup.broadinstitute.org/>. Accessed 16 October 2023.
- 678 41. ImageJ. <https://imagej.net/>. Accessed 18 October 2023.
- 679 42. ChatGPT-4. <https://chat.openai.com/>. Last accessed 09 November 2023.
- 680 43. SPINK1. <https://www.ncbi.nlm.nih.gov/gene/6690>. Accessed 16 October 2023.
- 681 44. Leman R, Gaildrat P, Gac GL, Ka C, Fichou Y, Audrezet MP, et al. Novel diagnostic tool for prediction of  
682 variant spliceogenicity derived from a set of 395 combined in silico/in vitro studies: an international  
683 collaborative effort. *Nucleic Acids Res.* 2018;46(15):7913-23.

685 **Table 1.** FLGSA data and Illumina precomputed SpliceAI  $\Delta$  scores for 27 known and 35 potential *SPINK1* coding SNVs

| Exon | Variant <sup>a</sup> |                   | Illumina precomputed SpliceAI scores <sup>b</sup> |             |              |                           | Generation of aberrant transcripts as determined by FLGSA <sup>c</sup> | Study      |
|------|----------------------|-------------------|---------------------------------------------------|-------------|--------------|---------------------------|------------------------------------------------------------------------|------------|
|      | Nucleotide change    | Amino acid change | AG                                                | AL          | DG           | DL                        |                                                                        |            |
| 1    | c.9A>C               | p.Val3Val         | 0.00                                              | 0.00        | 0.04         | 0.55 (3 bp) <sup>d</sup>  | No                                                                     | This study |
| 1    | c.9A>G               | p.Val3Val         | 0.00                                              | 0.00        | 0.04         | 0.54 (3 bp) <sup>d</sup>  | No                                                                     | This study |
| 1    | c.9A>T               | p.Val3Val         | 0.00                                              | 0.00        | 0.04         | 0.55 (3 bp) <sup>d</sup>  | No                                                                     | This study |
| 1    | c.11C>G              | p.Thr4Arg         | 0.00                                              | 0.00        | 0.44 (5 bp)  | 0.45 (-44 bp)             | No                                                                     | This study |
| 1    | c.15C>T              | p.Gly5Gly         | 0.00                                              | 0.00        | 0.52 (2 bp)  | 0.13 (-40 bp)             | No                                                                     | This study |
| 1    | c.26T>G              | p.Leu9Arg         | 0.00                                              | 0.00        | 0.03         | 0.29 (20 bp) <sup>d</sup> | No                                                                     | [31]       |
| 1    | c.29G>A              | p.Ser10Asn        | 0.00                                              | 0.00        | 0.11 (23 bp) | 0.03                      | No                                                                     | [31]       |
| 1    | c.36G>C              | p.Leu12Phe        | 0.00                                              | 0.00        | 0.02         | 0.10 (30 bp) <sup>d</sup> | No                                                                     | [31]       |
| 1    | c.41T>C              | p.Leu14Pro        | 0.00                                              | 0.00        | 0.01         | 0.04                      | No                                                                     | [31]       |
| 1    | c.41T>G              | p.Leu14Arg        | 0.00                                              | 0.00        | 0.02         | 0.09 (35 bp) <sup>d</sup> | No                                                                     | [31]       |
| 1    | c.43T>A              | p.Leu15Met        | 0.00                                              | 0.00        | 0.02         | 0.12 (37 bp) <sup>d</sup> | No                                                                     | This study |
| 1    | c.43T>C              | p.Leu15=          | 0.00                                              | 0.00        | 0.03         | 0.14 (37 bp) <sup>d</sup> | No                                                                     | This study |
| 1    | c.43T>G              | p.Leu15Val        | 0.00                                              | 0.00        | 0.38 (1 bp)  | 0.00                      | No                                                                     | This study |
| 1    | c.55G>A              | p.Gly19Ser        | 0.00                                              | 0.00        | 0.36 (49 bp) | 0.40 (0 bp)               | Yes (Intron 1 retention <sup>e</sup> /WT: 1/9.03)                      | This study |
| 1    | c.55G>C              | p.Gly19Arg        | 0.00                                              | 0.00        | 0.33 (49 bp) | 0.34 (0 bp)               | Yes (Intron 1 retention <sup>e</sup> /WT: 1/21.72)                     | This study |
| 1    | c.55G>T              | p.Gly19Cys        | 0.00                                              | 0.00        | 0.37 (49 bp) | 0.51 (0 bp)               | Yes (Intron 1 retention <sup>e</sup> /WT: 1/9.38)                      | This study |
| 2    | c.56G>A              | p.Gly19Asp        | 0.01                                              | 0.10 (0 bp) | 0.00         | 0.07                      | No                                                                     | This study |
| 2    | c.56G>C              | p.Gly19Ala        | 0.01                                              | 0.40 (0 bp) | 0.00         | 0.29 (-31 bp)             | Yes (E2 skipping/WT: 1/1.32)                                           | This study |
| 2    | c.56G>T              | p.Gly19Val        | 0.01                                              | 0.61 (0 bp) | 0.00         | 0.46 (-31 bp)             | Yes (E2 skipping/WT: 2.97/1)                                           | This study |
| 2    | c.65G>T              | p.Gly22Val        | 0.00                                              | 0.31 (9 bp) | 0.00         | 0.17 (-22 bp)             | Yes (E2 skipping/WT: 1/5.16)                                           | This study |
| 2    | c.75C>T              | p.Ser25=          | 0.00                                              | 0.02        | 0.00         | 0.02                      | No                                                                     | [31]       |

|   |          |            |      |              |             |              |                               |            |
|---|----------|------------|------|--------------|-------------|--------------|-------------------------------|------------|
| 2 | c.80G>T  | p.Gly27Val | 0.00 | 0.09         | 0.61 (2 bp) | 0.10 (-7 bp) | No                            | This study |
| 2 | c.84A>C  | p.Arg28Ser | 0.00 | 0.01         | 0.00        | 0.00         | No                            | This study |
| 2 | c.84A>G  | p.Arg28=   | 0.00 | 0.49 (28 bp) | 0.00        | 0.25 (-3 bp) | Yes (E2 skipping/WT: 10.80/1) | This study |
| 2 | c.84A>T  | p.Arg28Ser | 0.00 | 0.04         | 0.01        | 0.02         | No                            | This study |
| 2 | c.85G>T  | p.Glu29*   | 0.00 | 0.25 (29 bp) | 0.00        | 0.17 (-2 bp) | No                            | This study |
| 2 | c.86A>C  | p.Glu29Ala | 0.00 | 0.51 (30 bp) | 0.01        | 0.23 (-1 bp) | No                            | This study |
| 2 | c.86A>G  | p.Glu29Gly | 0.00 | 0.84 (30 bp) | 0.00        | 0.67 (-1 bp) | Yes (E2 skipping/WT: 4.13/1)  | This study |
| 2 | c.86A>T  | p.Glu29Val | 0.00 | 0.81 (30 bp) | 0.00        | 0.58 (-1 bp) | Yes (E2 skipping/WT: 1/5.31)  | This study |
| 2 | c.87G>A  | p.Glu29=   | 0.00 | 0.87 (31 bp) | 0.00        | 0.93 (0 bp)  | Yes (Complete E2 skipping)    | This study |
| 2 | c.87G>C  | p.Glu29Asp | 0.00 | 0.84 (31 bp) | 0.01        | 0.93 (0 bp)  | Yes (Complete E2 skipping)    | This study |
| 2 | c.87G>T  | p.Glu29Asp | 0.00 | 0.88 (31 bp) | 0.02        | 0.93 (0 bp)  | Yes (Complete E2 skipping)    | This study |
| 3 | c.88G>A  | p.Ala30Thr | 0.00 | 0.00         | 0.00        | 0.00         | No                            | This study |
| 3 | c.88G>C  | p.Ala30Pro | 0.00 | 0.00         | 0.00        | 0.00         | No                            | This study |
| 3 | c.88G>T  | p.Ala30Ser | 0.00 | 0.01         | 0.00        | 0.00         | No                            | This study |
| 3 | c.101A>G | p.Asn34Ser | 0.00 | 0.00         | 0.00        | 0.00         | No                            | [31]       |
| 3 | c.110A>G | p.Asn37Ser | 0.00 | 0.00         | 0.00        | 0.00         | No                            | [31]       |
| 3 | c.123G>C | p.Lys41Asn | 0.00 | 0.00         | 0.00        | 0.00         | No                            | [31]       |
| 3 | c.126A>G | p.Ile42Met | 0.00 | 0.00         | 0.00        | 0.00         | No                            | [31]       |
| 3 | c.133C>T | p.Pro45Ser | 0.00 | 0.00         | 0.00        | 0.00         | No                            | [31]       |
| 3 | c.137T>A | p.Val46Asp | 0.00 | 0.00         | 0.00        | 0.00         | No                            | [31]       |
| 3 | c.143G>A | p.Gly48Glu | 0.00 | 0.00         | 0.00        | 0.00         | No                            | [31]       |
| 3 | c.150T>G | p.Asp50Glu | 0.00 | 0.00         | 0.00        | 0.00         | No                            | [31]       |
| 3 | c.160T>C | p.Tyr54His | 0.00 | 0.00         | 0.00        | 0.00         | No                            | [31]       |
| 3 | c.163C>T | p.Pro55Ser | 0.00 | 0.00         | 0.00        | 0.00         | No                            | [31]       |
| 3 | c.174C>T | p.Cys58=   | 0.00 | 0.00         | 0.00        | 0.00         | No                            | [31]       |

|   |          |            |      |             |             |      |    |            |
|---|----------|------------|------|-------------|-------------|------|----|------------|
| 3 | c.178T>G | p.Leu60Val | 0.00 | 0.00        | 0.26 (1 bp) | 0.00 | No | This study |
| 3 | c.190A>G | p.Asn64Asp | 0.00 | 0.00        | 0.00        | 0.00 | No | [31]       |
| 3 | c.193C>T | p.Arg65Trp | 0.00 | 0.00        | 0.00        | 0.00 | No | [31]       |
| 3 | c.194G>A | p.Arg65Gln | 0.00 | 0.00        | 0.00        | 0.00 | No | [7]        |
| 3 | c.194G>C | p.Arg65Pro | 0.00 | 0.00        | 0.00        | 0.00 | No | This study |
| 3 | c.194G>T | p.Arg65Leu | 0.00 | 0.00        | 0.00        | 0.00 | No | This study |
| 4 | c.195G>A | p.Arg65=   | 0.00 | 0.03        | 0.00        | 0.00 | No | This study |
| 4 | c.195G>C | p.Arg65=   | 0.00 | 0.10 (0 bp) | 0.00        | 0.00 | No | This study |
| 4 | c.195G>T | p.Arg65=   | 0.00 | 0.23 (0 bp) | 0.00        | 0.00 | No | This study |
| 4 | c.198A>C | p.Lys66Asn | 0.01 | 0.00        | 0.00        | 0.00 | No | [31]       |
| 4 | c.199C>T | p.Arg67Cys | 0.00 | 0.01        | 0.00        | 0.00 | No | [31]       |
| 4 | c.200G>A | p.Arg67His | 0.00 | 0.00        | 0.00        | 0.00 | No | [31]       |
| 4 | c.203A>G | p.Gln68Arg | 0.01 | 0.00        | 0.00        | 0.00 | No | [31]       |
| 4 | c.206C>T | p.Thr69Ile | 0.00 | 0.01        | 0.00        | 0.00 | No | [31]       |
| 4 | c.231G>A | p.Gly77=   | 0.01 | 0.00        | 0.00        | 0.00 | No | [31]       |
| 4 | c.236G>T | p.Cys79Phe | 0.00 | 0.02        | 0.00        | 0.00 | No | [31]       |

686 *Abbreviations:* AG, acceptor gain; AL, acceptor loss; DG, donor gain; DL, donor loss; FLGSA, full-length gene splicing assay; SNVs, single-nucleotide variants;  
687 WT, wild-type

688 <sup>a</sup>*SPINK1* mRNA reference sequence: NM\_001379610.1.

689 <sup>b</sup>In parentheses: corresponding pre-mRNA positions are provided for  $\Delta$  scores  $\geq 0.10$ . Positive and negative pre-mRNA positions indicate positions 5' and 3'  
690 to the variant position in terms of the gene's sense strand.

691 <sup>c</sup>In parentheses: in case of the generation of aberrant transcripts, the nature of the aberrant transcripts and the ratio of aberrant transcripts to WT  
692 transcripts are indicated.

693 <sup>d</sup>Considered not to be physiologically relevant as the predicted donor loss is situated within exon 1 of the *SPINK1* gene.

694 <sup>e</sup>Retention of the first 140 bases of intron 1.
